# Supplementary material for: Associations of breastfeeding history with metabolic syndrome and cardiovascular risk factors in community-dwelling parous women: The Japan Multi-Institutional Collaborative Cohort Study
Source: PLoS One. 2022 Jan 19;17(1):e0262252. doi: 10.1371/journal.pone.0262252 (PMC8769371; doi:10.1371/journal.pone.0262252)
Supplement: S3 Table — Abbreviations: OR, odds ratio; CI, confidence interval. a All the indices of breastfeeding history were defined and categorized in the same way as in Tables 1 and 2. b Higher categories of breastfeeding history were as follows in all participants, those <55 years old, and those ≥55 years old: the longest breastfeeding duration: ≥8.1, ≥8.1, and ≥7.1 months, respectively; number of breastfed children: ≥2 children in all age groups; and total breastfeeding duration: ≥12.1, ≥15.7, and ≥12.1 months, respectively. c Models incorporated the same covariates as those of multivariable-adjusted models in Table 2 in the analyses of the longest and the total breastfeeding duration. In the analyses of the number of breastfed children, models incorporated the same covariates except for parity. d Odds ratios and 95% CIs were calculated using the unconditional binary logistic regression model. (XLSX) [file pone.0262252.s003.xlsx]

## Sheet: S3 Table
			All participants
Breastfeeding historya			Body mass index at about 20 years old (kg/m2)	Participants (n)	Number of participants in higher category of breastfeeding historyb		Multivariate-adjustedc		P trend
					n (%)		OR （95% CI）d
The longest breastfeeding duration			<18.5	1510	853	-56.5	1.00 (reference)		<0.001
			18.5–22.9	7612	4788	-62.9	1.30 (1.16 to 1.46)
			≥23.0	1682	1148	-68.3	1.66 (1.42 to 1.93)
Number of breastfed children			<18.5	1510	1199	-79.4	1.00 (reference)		0.006
			18.5–22.9	7612	6248	-82.1	1.15 (0.99 to 1.32)
			≥23.0	1682	1413	-84	1.30 (1.08 to 1.57)
Total breastfeeding duration			<18.5	1510	903	-59.8	1.00 (reference)		<0.001
			18.5–22.9	7612	5012	-65.8	1.24 (1.10 to 1.41)
			≥23.0	1682	1200	-71.3	1.56 (1.32 to 1.84)
			<55 years old
Breastfeeding historya			Body mass index at about 20 years old (kg/m2)	Participants (n)	Number of participants in higher category of breastfeeding historyb		Multivariate-adjustedc		P trend
					n (%)		OR （95% CI）d
The longest breastfeeding duration			<18.5	828	496	-59.9	1.00 (reference)		<0.001
			18.5–22.9	3231	2211	-68.4	1.39 (1.18 to 1.63)
			≥23.0	510	358	-70.2	1.48 (1.16 to 1.89)
Number of breastfed children			<18.5	828	652	-78.7	1.00 (reference)		0.029
			18.5–22.9	3231	2705	-83.7	1.29 (1.05 to 1.57)
			≥23.0	510	427	-83.7	1.32 (0.98 to 1.79)
Total breastfeeding duration			<18.5	828	485	-58.6	1.00 (reference)		0.013
			18.5–22.9	3231	2210	-68.4	1.35 (1.13 to 1.61)
			≥23.0	510	353	-69.2	1.29 (0.99 to 1.68)
			≥55 years old
Breastfeeding historya			Body mass index at about 20 years old (kg/m2)	Participants (n)	Number of participants in higher category of breastfeeding historyb		Multivariate-adjustedc		P trend
					n (%)		OR （95% CI）d
The longest breastfeeding duration			<18.5	682	357	-52.3	1.00 (reference)		<0.001
			18.5–22.9	4381	2578	-58.9	1.28 (1.08 to 1.52)
			≥23.0	1172	791	-67.5	1.66 (1.36 to 2.03)
Number of breastfed children			<18.5	682	547	-80.2	1.00 (reference)		0.031
			18.5–22.9	4381	3543	-80.9	1.03 (0.84 to 1.27)
			≥23.0	1172	986	-84.1	1.28 (0.99 to 1.64)
Total breastfeeding duration			<18.5	682	413	-60.6	1.00 (reference)		<0.001
			18.5–22.9	4381	2836	-64.7	1.18 (0.99 to 1.42)
			≥23.0	1172	861	-73.5	1.58 (1.27 to 1.96)
